# Supplementary material for: Health Risks and Consequences of a COVID-19 Infection for People with Disabilities: Scoping Review and Descriptive Thematic Analysis
Source: MDPI journal article supplement (doi:10.3390/ijerph18084348), 2021-04-20
Supplement: s1 [file s1]

## Supplementary material S1

### Search strategies

#### PubMed/Medline

("Refugees"[Mesh] OR "Refugee Camps"[Mesh] OR refugee\*[tw] OR asylum[tw] OR "Human Rights"[Mesh] OR "Social Justice"[Mesh] OR justice[tw] OR injustice[tw] OR "Community Integration"[Mesh] OR "Transients and Migrants"[Mesh] OR "Emigrants and Immigrants"[Mesh] OR \*migrant\*[tw] OR "Foreign Professional Personnel"[Mesh] OR "Ethnic Groups"[Mesh] OR "Indigenous Peoples"[Mesh] OR "Sexual and Gender Minorities"[Mesh] OR "Gender-Based Violence"[Mesh] OR "Sexism"[Mesh] OR "Gender Identity"[Mesh] OR "Religion"[Mesh] OR "Vulnerable Populations"[Mesh] OR vulnerab\*[tw] OR disadvantaged[tw] OR "Prisoners"[Mesh] OR "Enslaved Persons"[Mesh] OR "Homebound Persons"[Mesh] OR "Homeless Persons"[Mesh] OR homeless\*[tw] OR "Institutionalization"[Mesh] OR "Adolescent, Institutionalized"[Mesh] OR "Child, Institutionalized"[Mesh] OR "Long-Term Care"[Mesh] OR "Crime Victims"[Mesh] OR "Disaster Victims"[Mesh] OR "Medically Uninsured"[Mesh] OR "Medically Underserved Area"[Mesh] OR underserved[tw] OR "Minority Health"[Mesh] OR "Health Equity"[Mesh] OR "Health Services Accessibility"[Mesh] OR "Poverty"[Mesh] OR "Working Poor"[Mesh] OR "Employment"[Mesh] OR "Developing Countries"[Mesh] OR "low income"[tw] OR "Race Factors"[Mesh] OR "American Native Continental Ancestry Group"[Mesh] OR "Frail Elderly"[Mesh] OR "Comorbidity"[Mesh] OR "Rural Population"[Mesh] OR "Rural Health Services"[Mesh] OR "Rural Health"[Mesh]) **AND** ("COVID-19"[tw] OR "SARS-Cov-2"[tw] OR

"COVID-19"[Supplementary Concept] OR "SARS-CoV-2"[Supplementary Concept]) **AND**  
 ("Disabled Persons"[Mesh] OR "Health Services for Persons with Disabilities"[Mesh] OR  
 "Para-Athletes"[Mesh] OR "Disability Evaluation"[Mesh] OR "Disability Studies"[Mesh] OR  
 "Learning Disabilities"[Mesh] OR "Intellectual Disability"[Mesh] OR "Developmental  
 Disabilities"[Mesh] OR disab\*[tw] OR impair\*[tw] OR "special needs"[tw] OR "special  
 education"[tw])

### **Web of Science – Core Collection:**

(ALL=(vulnerab\*) OR ALL=(refugee\*) OR ALL=(asyl\*) OR ALL=(justice) OR ALL=(injustice) OR  
 ALL=(emmigr\*) OR ALL=(immigr\*) OR ALL=(migrant\*) OR ALL=(migrat\*) OR ALL=(ethnic) OR  
 ALL=(disadvantaged) OR ALL=(prisoner\*) OR ALL=(enslaved) OR ALL=(homebound) OR  
 ALL=(homeless) OR ALL=(victim\*) OR ALL=(violence) OR TS=(gender) OR ALL=(religion) OR  
 ALL=(uninsured) OR ALL=(underinsured) OR ALL=(underserved) OR ALL=(equity) OR  
 ALL=(poverty) OR ALL=(low income) OR ALL=(employment) OR ALL=(unemployment) OR  
 ALL=(race) OR ALL=(indigenous) OR ALL=(institutionalized) OR ALL=(frail elderly) OR  
 ALL=(comorbid\*) OR ALL=(long-term care) OR ALL=(rural) OR ALL=(remote)) **AND**  
 (ALL=(COVID-19) OR ALL=(SARS-CoV-2)) **AND** (ALL=(disab\*) OR ALL=(impair\*) OR  
 ALL=(special needs) OR ALL=(special education))

### **CINAHL – through EBSCO host**

(vulnerable or vulnerability or vulnerable populations or refugee\* or asyl\* or justice or  
 injustice or immigrat\* or emmigrat\* or migrat\* or migrant or ethnic or disadvantaged or

prisoner\* or enslaved or homebound or homeless or victim\* or violence or gender or religion or uninsured or underinsured or underserved or unemployment or employment or race or indigenous or institutionalized or long-term care or frail elderly or comorbid\* or rural or remote) **AND** (covid-19 or 2019-ncov) **AND** (disability or disabilities or disabled or impairment or impaired or special needs or special education)

- Apply related words ☒
- Also search within the full text of the articles ☒
- Apply equivalent subjects ☒

#### **APA PsycInfo – through EBSCO host**

(vulnerable or vulnerability or vulnerable populations or refugee\* or asyl\* or justice or injustice or immigrat\* or emmigrat\* or migrat\* or migrant or ethnic or disadvantaged or prisoner\* or enslaved or homebound or homeless or victim\* or violence or gender or religion or uninsured or underinsured or underserved or unemployment or employment or race or indigenous or institutionalized or long-term care or frail elderly or comorbid\* or rural or remote) **AND** (covid-19 or 2019-ncov) **AND** (disability or disabilities or disabled or impairment or impaired or special needs or special education)

- Apply related words ☒

- Also search within the full text of the articles ☒
- Apply equivalent subjects ☒

#### **AgeLine – through EBSCO host**

(vulnerable or vulnerability or vulnerable populations or refugee\* or asyl\* or justice or injustice or immigrat\* or emmigrat\* or migrat\* or migrant or ethnic or disadvantaged or prisoner\* or enslaved or homebound or homeless or victim\* or violence or gender or religion or uninsured or underinsured or underserved or unemployment or employment or race or indigenous or institutionalized or long-term care or frail or older or comorbid\* or rural or remote) **AND** (covid-19 or 2019-ncov) **AND** (disability or disabilities or disabled or impairment or impaired or special needs or special education)

- Apply related words ☒
- Apply equivalent subjects ☒

#### **ERIC: Educational Resource Information Center – through ProQuest**

((vulnerable) OR (vulnerability) OR (refugee\*) OR (asyl\*) OR (justice) OR (injustice) or (immigrat\*) or (emmigrat\*) or (migrat\*) or (migrant) or (ethnic) or (disadvantaged) or (prisoner\*) or (enslaved) or (homebound) or (homeless) or (victim\*) or (violence) or (gender) or (religion) or (uninsured) or (underinsured) or (underserved) or (unemployment) or (employment) or (race) or (indigenous) or (institutionalized) or (long-term care) or (frail elderly) or (comorbid\*) or (rural) or (remote)) **AND** ((covid-19) or (2019-ncov)) **AND**

((disability) or (disabilities) or (disabled) or (impairment) or (impaired) or (special needs) or (special education))

## **Scopus**

( ALL ( vulnerab\* ) OR ALL ( refugee\* ) OR ALL ( asyl\* ) OR ALL ( justice ) OR ALL ( injustice ) OR ALL ( emmigr\* ) OR ALL ( immigr\* ) OR ALL ( migrant\* ) OR ALL ( migrat\* ) OR ALL ( ethnic ) OR ALL ( disadvantaged ) OR ALL ( prisoner\* ) OR ALL ( enslaved ) OR ALL ( homebound ) OR ALL ( homeless ) OR ALL ( victim\* ) OR ALL ( violence ) OR ALL ( gender AND ( role OR identity ) ) OR ALL ( religion ) OR ALL ( uninsured ) OR ALL ( underinsured ) OR ALL ( underserved ) OR ALL ( equity ) OR ALL ( poverty ) OR ALL ( low AND income ) OR ALL ( employment ) OR ALL ( unemployment ) ALL ( race ) OR ALL ( indigenous ) OR ALL ( institutionalized ) OR ALL ( frail AND elderly ) OR ALL ( long-term AND care ) OR ALL ( rural ) OR ALL ( remote ) ) **AND** ( ALL ( covid-19 ) OR ALL ( sars-cov-2 ) ) **AND** ( ALL ( disab\* ) OR ALL ( impair\* ) OR ALL ( special AND needs ) OR ALL ( special AND education ) )

Include: Medicine; Social Sciences; Psychology; Nursing; Environmental Science; Neuroscience; Arts and Humanities; Computer Science; Business, Management, and Accounting; Health Professions; Economics, Econometrics and Finance; Dentistry; Decision Sciences.

## **MedRxiv**

(covid-19 or 2019-ncov) **AND** (disability or disabilities or disabled or impairment or impaired or special needs)

*Note:* the number of terms which can be included is limited.

## **SocARXIV**

(covid-19 or 2019-ncov) **AND** (disability or disabilities or disabled or impairment or impaired or special needs)

## **PsyArXiv**

(covid-19 or 2019-ncov) **AND** (disability or disabilities or disabled or impairment or impaired or special needs)
