# Supplementary material for: Health Risks and Consequences of a COVID-19 Infection for People with Disabilities: Scoping Review and Descriptive Thematic Analysis
Source: Int J Environ Res Public Health. 2021 Apr 20;18(8):4348. doi: 10.3390/ijerph18084348 (PMC8074171; doi:10.3390/ijerph18084348)
Supplement: Supplementary file 1 [file ijerph-18-04348-s001.zip › SM S2 - extractions.xlsx]

## Sheet: Data charted- content
				Textual Data Extractions - all the extractions are direct quotations from the articles
Authors and Date	Title	Publication Type	Geographical Focus	People with disabilities have greater/disproportionate risks of being infected (including by not accessing timely health care)	People with disabilities experience greater health consequences once infected	Reviewer’s brief synthesis of the paper
Abedi, V.; Olulana, O.; Avula, V.; Chaudhary, D.; Khan, A.; Shahjouei, S.; Li, J.; Zand, R., 2020	Racial, Economic and Health Inequality and COVID-19 Infection in the United States	Perspective Paper	United States of America (USA)	X	It has been reported that age 65 and older, body mass index > 40, immunosuppression, smoking, hypertension, cardiovascular diseases are underlying conditions that increase the risk of death from COVID-19. Factors significantly associated with higher mortality in the counties analyzed include ... a higher rate of people with disability in the county (est. 0.27, 95% CI:0.09, 0.45, p<0.02). A compar…	The authors point out that previous studies have found that older adults with co-morbidities are at higher risk of mortality resulting from COVID-19. The authors report that in their study from 369 counties, they found that higher mortality is associated with increased rates of poverty and increased rates of disability in a county. The article is about using secondary data related to the demograp…
Alexander, R.; Ravi, A.; Barclay, H.; Sawhney, I.; Chester, V.; Malcolm, V.; Brolly, K.; Mukherji, K.; Zia, A.; Tharian, R.; et al., 2020	Guidance for the Treatment and Management of COVID-19 Among People with Intellectual Disabilities	Perspective Paper	No geographical focus	This is a group that has marked comorbidity, and some will be at very high risk of severe illness due to SARSCoV-2 infection because of multi-morbidity.	Death was more likely among those who were older, had diabetes, coronary heart disease, hypertension, and an elevated sequential organ failure assessment (SOFA) score or quick SOFA score. There is, without a doubt, likely to be some apportioning of healthcare within some regions and people with IDs will be disadvantaged. Those with IDs are at higher risk than the general population from complicat…	In this article the authors discuss that individuals with ID have several comorbidities and are at higher risk of developing infection; experiencing more severe physical and mental impairments. The authors propose several risk mitigation strategies. (1) Using hospital passports or equivalent by consulting the individual with ID and their caregivers and/or family members. (2) COVID-19 care plan - …
Andrews, E.E.; Ayers, K.B.; Brown, K.S.; Dunn, D.S.; Pilarski, C.R., 2020	No body is expendable: Medical rationing and disability justice during the COVID-19 pandemic	Perspective Paper	No geographical focus	A great many people with disabilities are particularly vulnerable during this pandemic. Disabled people living in institutional settings such as group homes, assisted living facilities, and nursing homes, are at significant risk of contracting the virus in such confined settings by daily contact with numerous rotating caregivers who themselves are exposed to multiple other patients. Those who liv…	It has been reported that age 65 and older, body mass index > 40, immunosuppression, smoking, hypertension, cardiovascular diseases are underlying conditions that increase the risk of death from COVID-19. The disability community has been especially affected by predictions of demand outpacing necessary medical equipment supply to treat COVID-19. Disability activist and founder of the Autistic Sel…	The authors discuss that PwDs living in institutional settings are at high risk of contracting COVID-19; and so are those with disabilities who need support from caregivers for their daily activities. The authors also discuss that given several state policies on medical rationing, the disabled communities fear disparities in healthcare and medical care access. The authors discuss that under-repre…
Armitage, R.; Nellums, L.B., 2020	The COVID-19 response must be disability inclusive	Perspective Paper	Romania	X	The coronavirus disease 2019 (COVID-19) pandemic is likely to disproportionately affect these individuals, putting them at risk of increased morbidity and mortality. PLWD might be at increased risk of severe acute respiratory syndrome coronavirus 2 infection or severe disease because of existing comorbidities, and might face additional barriers to health care during the pandemic. PLWD might have …	The authors describe that individuals with disabilities are at higher risk of being disproportionately affected leading to severe morbidity and mortality. These individuals might not have access to healthcare services. The authors propose three strategies - (1) All communications should be in plain language and accessible to all individuals. (2) Protective measures should be used for these indivi…
Azarpazhooh, M.R.; Amiri, A.; Morovatdar, N.; Steinwender, S.; Rezaei Ardani, A.; Yassi, N.; Biller, J.; Stranges, S.; Tokazebani Belasi, M.; Neya, S.K.; et al., 2020	Correlations between COVID-19 and burden of dementia: An ecological study and review of literature	Perspective Paper	No geographical focus	Patients with dementia are among the most vulnerable populations due to ageing, frailty, chronic immune dysregulation and comorbidity of other chronic diseases, particularly vascular disorders. In addition, case fatality of COVID-19 is significantly higher in the elderly with dementia. Globally, we found significant moderate positive correlations between life expectancy (r = 0.60, p < .001), [Hea…	Individuals with dementia are faced with a “double burden”, as the pandemic exacerbates both their vulnerability due to increased morbidity and mortality and breakdown of their social supports and access to their healthcare system due to lockdown and social distancing measures. Case fatality of COVID-19 is significantly higher in the elderly with dementia. Globally, we found significant moderate …	In their study, the authors studied the relationship between individuals with dementia and life expectancy with COVID-19 cases and with COVID-19 mortality. era of COVID-19 pandemic. The authors found that life expectancy and Healthy Life Expectancy (HALE) had significant correlations with COVID-19 case numbers and deaths. To prevent the spread of COVID-19, the authors recommend: Strict environmen…
Balestrini, S.; Koepp, M.J.; Gandhi, S.; Rickman, H.; Shin, G.Y.; Houlihan, C.; Anders-Cannon, J.; Silvennoinen, K.; Xiao, F.; Zagaglia, S.; et al., 2020	Clinical outcomes of SARS-CoV-2 pandemic in long-term care facilities for people with epilepsy: observational study	Perspective Paper	No geographical focus	Once COVID-19 is introduced into a care-facility, it has the potential to spread rapidly and widely, causing serious adverse outcomes among those in care and those providing it. Enhanced surveillance, available at CCE, revealed a high rate of asymptomatic SARS-CoV-2 infected residents (7/9 tested positive; 78%). Care facilities are highly vulnerable to COVID-19 outbreaks.	Our case fatality rate was high (CCE: 50%, or 11% corrected for asymptomatic; STE: 33%), but total number of deaths, one at each of the two centres, was in line with the average death rate for a 12 weeks observation period over the last five years. Our observations at CCE of a relatively low (9%) infection but high (78%) asymptomatic rates are similar to the report of initially heathy populations…	The authors discuss how three long term care facilities managed care during the pandemic. The facilities were Chalfont Centre for Epilepsy (CCE), St. Elisabeth (STE), and The Meath (TM). The authors reported on the COVID-19 rates among the 286 long-term residents, and 740 carers. The authors also provided detailed description of the steps taken by the facilities to manage the infection control. S…
Ben-Pazi, H.; Beni-Adani, L.; Lamdan, R., 2020	Accelerating Telemedicine for Cerebral Palsy During the COVID-19 Pandemic and Beyond	Perspective Paper	No geographical focus	Individuals with CP are not specifically at risk from COVID-19, unless they suffer from comorbidities such as pulmonary disease or elevated blood pressure. However, to minimize exposure, many children stay home away from the daily treatments and services provided in rehabilitation schools and clinics.	Individuals with CP are not speciﬁcally at risk from COVID-19, unless they suﬀer from comorbidities such as pulmonary disease or elevated blood pressure. While much emphasis is on medical or physical risk and deterioration, the emotional comorbidity is relatively neglected. Individuals with chronic disabilities, including CP, have higher rates of anxiety and depression, and this is expected to wo…	This study reviewed the challenges and opportunities of telemedicine in cerebral palsy. The authors discussed that although children with CP are not specifically at risk from COVID-19; however, several children with CP might stay home to avoid exposure and risk not going to therapy or rehabilitation. This can lead to increased rates of stress and anxiety, worsen hypertonia, increase the risk of c…
Boyle, C.A.; Fox, M.H.; Havercamp, S.M.; Zubler, J., 2020	The public health response to the COVID-19 pandemic for people with disabilities	Perspective Paper	No geographical focus	While disability is not inherently linked to increased risk of getting COVID-19 infection or in experiencing more severe disease, factors or circumstances associated with disabilities may increase these risks. PwDs are more likely to have an underlying health problem and are more likely to live in congregate care settings than those without disabilities. Additionally, because of the nature of som…	Specifically, PwDs are more likely to have an underlying health problem 2,3 and are more likely to live in congregate care settings than those without disabilities. A recent analysis of national mortality data for deaths attributed to pneumonia prior to the COVID-19 outbreak indicated a 2 to 6 times higher death rate due to pneumonia in people with intellectual and developmental disabilities comp…	PwDs are more likely to experience vulnerabilities related to COVID-19 that include more complications, or lack of access to care. The authors discuss that social isolation strategies might leave PwDs with no caretaker thereby causing difficulties with communications. Authors suggest that all surveillance data collect disability-related information. Additionally, disability related information sh…
Brown, E.E.; Kumar, S.; Rajji, T.K.; Pollock, B.G.; Mulsant, B.H., 2020	Anticipating and Mitigating the Impact of the COVID-19 Pandemic on Alzheimer's Disease and Related Dementias	Perspective Paper	No geographical focus	Several features of ADRD may increase the risk of contracting COVID-19. Some with MCI or milder dementias may be unwilling or unable to comply due to apathy or depression. Many individuals with ADRD require a supportive living environment because of a decreased level of functioning. In these settings, physical touching and toileting, crowding and shared rooms, and staff working in multiple settin…	This pandemic further exacerbates their [individuals with Alzheimer’s disease and related dementias (ADRD)] vulnerability, due to both the morbidity and mortality from COVID-19 and the indirect effects of the pandemic on the social supports and the health care system on which they depend. Beyond age, increased morbidity and mortality is expected in patients with ADRD due to the association of ADR…	In this paper, the authors discuss several vulnerabilities experienced by individuals with ARDS, their caregivers, their care providers including healthcare professionals, and research that includes individuals with ARDS. Although this paper was primarily aimed at listing and describing the vulnerabilities experienced, the authors provided some actions that they felt could benefit the individuals…
Chase, J., 2020	Caring for Frail Older Adults During COVID-19: Integrating Public Health Ethics into Clinical Practice	Perspective Paper	No geographical focus	X	Healthcare providers, administrators, patients, and families may be confronted with unfamiliar and uncomfortable rationing. Patient frailty should carry signiﬁcant weight in resource allocation decision-making. Caring for a frail older adult with severe COVID-19 is not different than caring for that same patient in the setting of any other critical illness, so long as resource scarcity does not r…	In this article, the authors discuss that frail older adults are more vulnerable to the COVID-19 infection. They recommend using the Public Health Ethics Principle as a framework for COVID-19 decision making. They provide some of the PHE principles, their definitions and some examples of how it can used to make COVID-19 decisions. The authors describe that some of these principles have already be…
Chen, B.; McNamara, D.M., 2020	Disability Discrimination, Medical Rationing and COVID-19	Perspective Paper	No geographical focus	X	Vulnerable members of society, including older persons and people with disabilities, were seen as being most at risk, and healthcare professionals were advised to prioritise those who had the best chance of recovery in the event of a mass outbreak The reported rise in the number of ‘do not resuscitate’ orders being imposed on people with disabilities has caused particular concerns from a human ri…	The authors the vulnerabilities of PwDs that might result in health workers to make triage decisions. The authors point out that PwDs might be deprived of required and much needed care if they are deemed of much poorer health. These are the same reasons why DNR decisions have been made or might be made for those with disabilities. The authors point out that the CRPD prohibits all discrimination b…
Courtenay, K.; Perera, B., 2020	COVID-19 and people with intellectual disability: impacts of a pandemic	Perspective Paper	No geographical focus	People with ID are at greater risk of infection for a range of reasons that include physical health problems, social circumstances and limitations in understanding. There is growing international concern that people with intellectual disabilities, many of whom have compromised health, are particularly vulnerable to infection by COVID-19.	The level of obesity is higher among people with ID raising their risk of experiencing severe forms of infection with COVID-19. People with ID are vulnerable to exploitation by others where the usual community supports no longer function to protect them.	This paper discusses vulnerabilities experienced by individuals with ID. The authors discuss that individuals with ID are at higher risk of developing infection and at more severe infection. Additionally, individuals with ID, autism, ADHD might have difficulty with adhering to health measures to avoid the infection. Their healthcare provision might be impacting thereby influencing their routine a…
Cox, D.J.; Plavnick, J.B.; Brodhead, M.T., 2020	A Proposed Process for Risk Mitigation During the COVID-19 Pandemic	Perspective Paper	South Africa	Thus, blanket decisions to stop all ABA services may place some ABA consumers ... at an increased risk of contracting COVID-19 if hospitalized.	To compound the previous points, the states of Arizona and Washington have issued policies that people with disabilities have a lower priority to receive critical and lifesaving medical care... confusion around this issue could further limit access to lifesaving care for people with disabilities, including individuals with ASD.	The authors discuss that using a blanket statement that ABA therapists are essential can be detrimental – ABA therapists providing in-person service can contract COVID-19 and transfer it to their clients increasing their exposure to the infection. However, stopping all ABA services due to the pandemic is also detrimental because several ABA consumers are likely to cause self-harm and this can mak…
De Cauwer, H.; Spaepen, A., 2020	Are patients with Down syndrome vulnerable to life-threatening COVID-19?	Perspective Paper	No geographical focus	X	We believe that immune dysregulation and increased cytokine production in DS patients make them vulnerable to infections like RSV and COVID-19 as mortality is mainly related to cytokine release syndrome. Moreover, we are concerned about insufficient immunity after disease recovery, and, thus, a higher risk of reinfection. As DS patients risk inadequate immunity after vaccination, they would still…	In our facility for patients with intellectual disabilities, an outbreak of COVID caused severe disease course only in DS patients. In 2020, we are confronted with the COVID-19 pandemic. Some studies report that children are less prone to COVID-19. This paper discusses that patients with Down Syndrome are at increased risk of contracting COVID-19 and can have exacerbated symptoms. They present co…
Devita, M.; Bordignon, A.; Sergi, G.; Coin, A., 2020	The psychological and cognitive impact of Covid-19 on individuals with neurocognitive impairments: research topics and remote intervention proposals	Perspective Paper	United Kingdom (UK)	Older individuals are among the most frail populations exposed to Covid-19 contagion. The Covid-19 pandemic could be really dramatic for these persons as they may have difficulties in remembering to wear a mask, or in understanding public health information and the constraints imposed, and hence in complying with them.	As showed by the literature daily updated, it particularly concerns older people causing severe lungs and systemic infammatory sequelae often requiring hospitalization and the subsequent, well known, related medical complications. This issue is even truer for individuals with neurocognitive disorders that are “the frailest among the frailest”. For them, hospitalization, acute infammatory status a…	The authors discuss that older adults are among the vulnerable population. Older adults with neuro-cognitive impairment are "frailest of the frailest". These individuals can experience worse symptoms during COVID-19, and also experience challenges due to the stay-at-home order. Caregivers and family members might also find it challenging to take care of older adults with neuro-cognitive difficult…
Eskytė, I.; Lawson, A.; Orchard, M.; Andrews, E., 2020	Out on the Streets - Crisis, Opportunity and Disabled People in the Era of Covid-19: Reflections from the UK	Perspective Paper	No geographical focus	This is likely to be particularly difﬁcult for people with visual impairments, unable to see how close they are to another person; people with mobility impairments, who may not easily be able to adjust their position relative to another person; and people with cognitive impairments or neurodiversity, who may ﬁnd it difﬁcult to process or understand the need to stay two metres away from others.	Nevertheless, the amount of individual variation means that global categorizations based purely on diagnostic labels can easily create injustice. For example, many of the people dying of COVID-19 are categorized as clinically obese, and associated morbidities such as hypertension probably contribute to their death; but not all individuals with a high BMI have seriously raised blood pressure or ot…	This paper explores the implications accessibility measures outside home environment in the UK for disabled people, with a particular focus on measures designed to reduce and reshape the use of streets and public space. The authors bring in experiences in the UK to reﬂect on the disability-related implications of such guidelines and regulations, using streets in towns and cities as our focus. Ove…
Favalli, E.G.; Ingegnoli, F.; De Lucia, O.; Cincinelli, G.; Cimaz, R.; Caporali, R., 2020	COVID-19 infection and rheumatoid arthritis: Faraway, so close!	Perspective Paper	No geographical focus	X	Rheumatic patients, which are intrinsically characterized by an increased infectious risk due to the disease itself and to the iatrogenic effect of immunosuppressive agents such as corticosteroids and synthetic or biological disease-modifying drugs. RA patients had a significantly higher risk of serious (RR 1.53, 95% CI 1.41–1.65) and hospitalized (RR 1.88, 95% CI 1.71–2.07) infections.	This article is related to drug related correlations of COVID and RA, but addresses added risks of more severe infections. The authors discuss about the risk of infections in general for those with rheumatoid arthritis. The authors state that they need to wait and watch for COVID-19 infections. The authors discuss the role of medicines used in rheumatoid arthritis as potential drugs for COVID-19.
Fernández-Díaz, E.; Iglesias-Sánchez, P.P.; Jambrino-Maldonado, C., 2020	Exploring WHO Communication during the COVID 19 Pandemic through the WHO Website Based on W3C Guidelines: Accessible for All?	Perspective Paper	No geographical focus	Not all the information is accessible in accordance with the Web Content Accessibility Guidelines 2.1, which implies that there are groups that are, to some extent, left out, especially affecting the elderly. The content offered to inform about the [COVID-19] disease is prepared so that any person can access it, regardless of their technology (hardware, software, or network infrastructure), langu…	One interpretation of this discrimination is a straightforward disvaluing of the lives of people with disability. In practice, it is more likely to be evidence of a complex (but no less unacceptable) form of disablism, defined as those practices of contemporary society that exclude, eradicate, and oppress people with sensory, physical, or intellectual impairments.	The study assessed if WHO made itself accessible to all citizens on the internet. This study was conducted during the pandemic (March-May 2020). The authors point out how some information put forward by WHO on the internet may not be accessible by PwDs. The study describes an analysis of WHO website for accessibility according to the WCAG guidelines. Findings suggest that WHO web site is not full…
Glover, R.E.; van Schalkwyk, M.C.I.; Akl, E.A.; Kristjannson, E.; Lotfi, T.; Petkovic, J.; Petticrew, M.P.; Pottie, K.; Tugwell, P.; Welch, V., 2020	A framework for identifying and mitigating the equity harms of COVID-19 policy interventions	Perspective Paper	United Kingdom (UK)	Some South American prisons halted visits. Prevalence of disabilities high in incarcerated people. [leading to] High rates of COVID-19 Canadian children’s autism therapy disrupted. High risk of COVID-19	X	This article highlights that COVID-19 lockdown policies particularly affect vulnerable populations including people with disabilities by both exacerbating the existing inequities and generating new ones. The authors provide two examples in relation to this. One prisoners incarcerated in prison in a HIC setting and A service disruption in a Autism therapy centre in HIC setting. The Authors describ…
Goggin, G.; Ellis, K., 2020	Disability, communication, and life itself in the COVID-19 pandemic	Perspective Paper	No geographical focus	X	Even more troubling was when health services began to be denied to people with disability in particularly hard-hit countries. The larger coordinates of the threat became apparent that pre-established frameworks for ethical decision making in health crises excluded people with disability due to preconceived notions about the quality of life. Disabled population faced greater risk and were left uns…	The authors discuss the inequities experienced by individuals with disabilities during COVID-19. The one-size-fits-all approach put those with disabilities in a vulnerable position with limited access to resources. Isolation and social distancing efforts were challenging for those who were Deaf-Blind and relied on tactile cues; and for older adults who required continued support and care. The aut…
Guidry-Grimes, L.; Savin, K.; Stramondo, J.A.; Reynolds, J.M.; Tsaplina, M.; Burke, T.B.; Ballantyne, A.; Kittay, E.F.; Stahl, D.; Scully, J.L.; et al., 2020	Disability Rights as a Necessary Framework for Crisis Standards of Care and the Future of Health Care	Perspective Paper	United Kingdom (UK)	Many cannot practice physical distancing, self-monitor their symptoms, or communicate their needs independently …. make their residents vulnerable to Covid-19	Some people with disabilities require continual bedside caregiving in the hospital that an overwhelmed hospital staff may not be able to provide even in an intensive care unit. This extra caregiving would typically be supplied by family members or attendants who have long-standing relationships with the patients and knowledge of their needs. In ordinary times, such caregivers can be uniquely posi…	This article stresses the importance of fairness, equitable processes; community and provider engagement, education, and communication; and the rule of law that could protect and promote the rights of PWD especially when these aspects are implemented during crisis standards of care planning. The authors make several recommendation to ensure this. The authors discuss that individuals with disabili…
Iaboni, A.; Cockburn, A.; Marcil, M.; Rodrigues, K.; Marshall, C.; Garcia, M.A.; Quirt, H.; Reynolds, K.B.; Keren, R.; Flint, A.J., 2020	Achieving Safe, Effective, and Compassionate Quarantine or Isolation of Older Adults With Dementia in Nursing Homes	Perspective Paper	No geographical focus	Isolating and screening nursing home residents based on symptoms alone would fail to identify approximately half of residents with COVID-19. In particular, the perception that infection control practices are in conflict with quality of life goals and the rights of the resident are an important barrier to their effective use. While international guidance has been consistent in recommending isolati…	X	In this paper, the authors discuss that during COVID-19, it has been challenging to isolate patients, especially those with dementia. Achieving quarantine and isolation while upholding ethical practices and maintaining quality of life has been difficult to implement. The authors suggest use of clinical guidance on how isolation will be achieved while addressing needs of the client and minimizing …
Ibanez, A.; Kosik, K.S., 2020	COVID-19 in older people with cognitive impairment in Latin America	Perspective Paper	No geographical focus	Millions populate densely packed favelas or barrios, in which large families often share a single room, and many find moving a grandparent to a nursing home inconceivable. However, older people cannot be quarantined within crowded living quarters, where they can be exposed to young asymptomatic carriers, and older people who live alone struggle to access care without risking contact with infected…	X	In this correspondence, the authors discuss that persons with dementia in Latin American and Caribbean countries are vulnerable to complications from the pandemic. The authors discuss that it is a challenge to socially distance older adults with dementia especially when they live in close quarters with their families. Barriers to telemedicine due to poor internet further complicates the process o…
Jesus, T.S.; Landry, M.D.; Jacobs, K., 2020	A 'new normal' following COVID-19 and the economic crisis: Using systems thinking to identify challenges and opportunities in disability, telework, and rehabilitation	Perspective Paper	No geographical focus	As a group, people with disabilities face higher risks of contracting the COVID-19. Finally, due to societal responses, many people with disabilities are institutionalized and hence exposed to physical contacting risks. Due to the nature of the challenges that people with disabilities may experience, they may have greater difficulties understanding or otherwise complying with physical distancing …	Additionally, if and once infected, people with disabilities also face higher risks of more severe consequences. People with disabilities often have higher rates of chronic or secondary conditions, and given that COVID-19 exacerbates existing health conditions, particularly those related to respiratory function, immune system function, heart disease or diabetes [3], a person with disabilities may…	In this paper, the authors use a systems thinking (ST) perspective to explore and elaborate on current challenges, and offer suggestions on where opportunities can be seized in order to develop a ‘new normal’ in a post-COVID-19 pandemic era. The authors describe the challenges and opportunities for PWDs, the disability and rehabilitation ﬁelds during the COVID-19 pandemic. The authors discuss tha…
Korupolu, R.; Stampas, A.; Gibbons, C.; Hernandez Jimenez, I.; Skelton, F.; Verduzco-Gutierrez, M., 2020	COVID-19: Screening and triage challenges in people with disability due to Spinal Cord Injury	Perspective Paper	No geographical focus	Individuals with SCI develop a myriad of physiological changes that not only increase their risk of morbidity from COVID-19, but may also mask the presentation of an acute respiratory illness which can potentially delay the diagnosis of COVID-19. In an international survey of health care professionals (n = 783) who care for individuals with SCI, 10.3% reported their patients with COVID-19 had inc…	There is a paucity of further guidance for people with spinal cord injury (SCI) who may not present with typical symptoms of COVID-19 due to altered physiology. This may pose challenges with surveillance, risk stratiﬁcation, and initial management of this vulnerable population. Individuals with SCI develop a myriad of physiological changes that not only increase their risk of morbidity from COVID…	In this paper, the authors discuss that individuals with SCI are likely to experience a myriad of symptoms that can be worse than they look. The authors discuss the CDC-provided list of symptoms and discuss that individuals with SCI may not present with a fever and their cough might be suppressed. They may not experience the same level of chest pain as others due to the neurological and physiolog…
Kuper, H.; Banks, L.M.; Bright, T.; Davey, C.; Shakespeare, T., 2020	Disability-inclusive COVID-19 response: What it is, why it is important and what we can learn from the United Kingdom’s response	Perspective Paper	No geographical focus	It is clear that disabled people are among the most vulnerable to contracting the virus. People are being urged to physically isolate, stay at home, and reduce social contacts in order to protect themselves and others from the virus, but these measures may present difficulties for disabled people. For example, people with sensory or intellectual impairments may lack the necessary information abou…	Disabled people may also be at greater risk of morbidity and mortality if they contract the virus, yet in danger of being deprioritised for care. . All too often, disabled people are left behind in emergencies, and this is a risk in the ongoing COVID-19 pandemic. Disabled people may also be at greater risk of morbidity and mortality if they contract the virus. Not only are they older on average, …	In this open letter, the authors discuss the vulnerabilities that PwDs face with COVID-19, and the resulting measures taken to avoid contracting the infection. The authors point out that due to isolation practices, PwDs may not have access to medications, required healthcare or have access to all information. This makes them vulnerable not only to get infected, but also experience higher morbidit…
Landes, S.D.; Turk, M.A.; Formica, M.K.; McDonald, K.E.; Stevens, J.D., 2020	COVID-19 outcomes among people with intellectual and developmental disability living in residential group homes in New York State	Perspective Paper	No geographical focus	There may be increased risk from COVID-19 for individuals living in congregate care settings due to the challenges these types of residence present to physical distancing. This is particularly salient for people with IDD, as it is estimated that 13% of adults with IDD reside in congregate care settings, with shared use of essential living spaces (e.g., bedrooms, bathrooms, kitchens), close proxim…	Higher COVID-19 case-fatality rates for patients with than without IDD at ages 0-17 and 18 - 74. The case-fatality and mortality rates were markedly higher for people with IDD than for New York State across the entire state: 15.0% compared to 7.9% for case-fatality; 1,175 per 100,000 compared to 151 per 100,000 for mortality rates. Results from this study clearly demonstrate that COVID-19 case ra…	The authors discuss that individuals with Intellectual and Developmental Disability are at higher risk of COVID-19, especially those who live in residential care facilities. Their study of comparing case incidence and mortality supports their hypothesis that individuals with IDD had higher rates of COVID-19 infection (15% vs 7.9%) and higher mortality rates (1,175 per 100,000 vs 151 per 100,000) …
Landi, D.; Ponzano, M.; Nicoletti, C.G.; Cecchi, G.; Cola, G.; Mataluni, G.; Mercuri, N.B.; Sormani, M.P.; Marfia, G.A., 2020	Adherence to social distancing and use of personal protective equipment and the risk of SARS-CoV-2 infection in a cohort of patients with multiple sclerosis	Perspective Paper	No geographical focus	Patients with Multiple Sclerosis (MS), although not specifically mentioned in the DPCM, are considered among people at major risk, considering their neurological disability, comorbidities and immunosuppressive treatments. The results of this survey showed generally good adherence of MS patients to lockdown and an extensive use of protection devices, as measured by the Lockdown Scores (LS). The su…	X	This study utilized a survey to assess the adherence to protective measures against exposure to COVID-19 by people with MS. The survey found that older adults with MS and those with disability had higher lockdown score indicating that they used stronger precautions against exposure. The survey also found that majority of the respondents did not leave home for work. However, the survey also identi…
Llanes Mabalot, C., 2020	Advocacy During Covid-19	Perspective Paper	No geographical focus	This situation posts the potential breakdown of household units. Meanwhile, residents of institutions that have remained operational are exposed to higher risks of contracting the virus. Challenging for [PWD] to understand the new rules and changes imposed suddenly . Difficulty in maintaining standards of hygiene during home visits to protect both staff and the individual …….. who gets first care…	Ugly reality is that some individuals with special needs who have contracted the virus have been denied treatment they deserve because of medical rationing.	The article descries the challenges during the pandemic specifically relating to employment, social distancing, transportation, education, health care and civil rights violation. It also recommends for advocating to together for resolving specific issues with specific recommendations. In this article, the author discusses the challenges that PwDs are facing during the COVID-19 pandemic. She discu…
Lund, E.M., 2020	Interpersonal violence against people with disabilities: Additional concerns and considerations in the COVID-19 pandemic	Perspective Paper	No geographical focus	Additionally, the use of backup caregivers may also pose a risk to the disabled person. Even asymptomatic or pre-symptomatic infected individuals can spread COVID-19 to others, and thus, any person used as a backup caregiver could be potentially infectious, even if they do not show symptoms. This risk is further heightened by the fact that many tasks for which individuals with disabilities requir…	Disabled activists have raised concerns about health care–rationing policies that disadvantage people with disabilities and make decisions based on premorbid functioning and the physician’s valuation of patients’ lives. People with disabilities may be concerned that active involvement with APS surrounding their ability to keep themselves safe could lead to an even lesser valuation of their life b…	In this paper the authors discuss that the pandemic has exacerbated the abuse that PwDs experience. Due to the social distancing measures, lockdown measures, PwDs are in close quarters with their abusers. Also, telehealth services have led to minimal privacy. PwDs may need help from their caregivers who could also be their abusers. The authors provide several examples of vulnerabilities experienc…
Lund, E.M.; Ayers, K.B., 2020	Raising awareness of disabled lives and health care rationing during the COVID-19 pandemic.	Perspective Paper	No geographical focus	X	These complaints cited violations of federal law aimed to protect people with disabilities from discrimination through the allowance of reasonable accommodations and the prohibition of denial of services or care on the basis of disability status. Additionally, concerns about emphases on “pre-morbid functioning” were raised, as these emphases inherently disadvantage people with disabilities and ch…	This editorial discuss the importance that psychologist has to give to ensure PWDs are included in plans related to health and development. The authors highlight the situation of PWDs in the COVID pandemic and advocate for the psychologists and the larger community to get together for promoting the rights of the disabled. PwDs are vulnerable to rationing efforts during COVID-19. Additionally emph…
Manchanda, E.C.C.; Sanky, C.; Appel, J.M., 2020	Crisis Standards of Care in the USA: A Systematic Review and Implications for Equity Amidst COVID-19	Perspective Paper	No geographical focus	X	The development of CSC, while critically important to support clinicians and healthcare systems during times of crisis, must not be undertaken in a rushed or siloed manner. Nineteen (65.5%) explicitly articulated that resource allocation decisions should be made without regard to race, ethnicity, disability, and other identity-based factors. Ten CSC (34.5%) incorporated exclusion criteria which w…	The authors reviewed state-level Crisis Standards of Care (CSC) within US. They found that 19 CSC had explicitly mentioned that decisions should be made irrespective of criteria such as disability. When making triage decisions, 10 CSC had incorporated exclusion criteria for those who had low likelihood of immediate survival. The authors also point out that when a CSC was not equitable, the public…
Manto, M.; Dupre, N.; Hadjivassiliou, M.; Louis, E.D.; Mitoma, H.; Molinari, M.; Shaikh, A.G.; Soong, B.W.; Strupp, M.; Van Overwalle, F.; et al., 2020	Medical and Paramedical Care of Patients With Cerebellar Ataxia During the COVID-19 Outbreak: Seven Practical Recommendations of the COVID 19 Cerebellum Task Force	Perspective Paper	United States of America (USA)	Patients with cerebellar ataxia (CA) are particularly vulnerable to severe outcome if they contract COVID-19 because of the complexity of their disease, the presence of comorbidities, and their use of immunosuppressive therapies. Neurocognitive and behavioral-aﬀective syndrome in CA patients manifests with impairments in executive function and visuo-spatial cognition and in personality changes, i…	Patients with cerebellar ataxia (CA) are particularly vulnerable to severe outcome if they contract COVID-19 because of the complexity of their disease, the presence of comorbidities, and their use of immunosuppressive therapies. First, dysphagia, ataxic respiration, maintenance of airway protection, and aspiration pneumonia are an ever-present concern and risk in CAs. Should CA patients contract…	This article explains the risk that persons with Cerebellar Ataxia experience during the COVID-19 pandemic. The authors also recommend the ways to support them to have access to continued support, rehabilitation and care. The authors discuss that individuals with cerebellar ataxia are vulnerable to developing COVID-19 infections. Additionally, with the halt in rehabilitation services, their healt…
McKinney, E.L.; McKinney, V.; Swartz, L., 2020	COVID-19, disability and the context of healthcare triage in South Africa: Notes in a time of pandemic	Perspective Paper	United States of America (USA)	Disabled people are at an increased risk of contracting COVID-19 for a number of reasons, including difficulty with using basic protection measures and adhering to requirements set for social distancing. These difficulties include a lack of accessibility to water, sanitation and hygiene facilities. For example, the majority of disabled people live in homes without access to running water. Further…	The current COVID-19 triage policies and practices in South Africa may exclude or disadvantage many disabled people, especially people with physical and intellectual impairments, from gaining intensive care unit (ICU) access and receiving ventilators if becoming ill. According to Pineda and Corburn (2020), disabled people living in cities during COVID-19 may be four times more likely to be injure…	The article is a review of literature in the context of south Africa to manage the triage of PWD during the pandemic. Though there are several policies laws and regulations in place. The context of pandemic had turned a blind eye for PWD especially when it comes to TRIAGE for services according to the authors. They recommend the government to understand the issues and challenges for PWDs when off…
Mello, M.M.; Persad, G.; White, D.B., 2020	Respecting Disability Rights — Toward Improved Crisis Standards of Care	Narrative Review	No geographical focus	X	In March and April 2020, disability rights advocacy groups and persons with disabilities filed complaints with the HHS Office of Civil Rights (OCR) alleging that guidelines put forth by Alabama, Kansas, New York, Pennsylvania, Tennessee, Utah, and Washington illegally discriminated against persons with disabilities. (…) Analysis of these complaints suggests that policymakers and hospitals can tak…	This perspective paper describes the importance that one must give to antidiscrimination and harm that may be caused to PWD during the pandemic even if there are regulations and legal protection for PWD . The authors also recommend some solutions to make this happen. In times of emergency, many legal strictures can flex. For example, to enable hospitals to respond to Covid-19, the Department of H…
Muruganandam, P.; Neelamegam, S.; Menon, V.; Alexander, J.; Chaturvedi, S.K., 2020	COVID-19 and Severe Mental Illness: Impact on patients and its relation with their awareness about COVID-19	Narrative Review	United States of America (USA)	During the lockdown, patients diagnosed as SMI who need regular medication and rehabilitation are deprived of their care due to decreased access to health care in psychiatric hospitals. These patients are not only vulnerable to increased risk of contracting the infection easily but may transmit COVID-19 infection by not strictly following the safety measures. From China where around 300 psychiatr…	X	This article describes the impact of lack of knowledge about COVID 19 and it impact on people with SMI. 2/3rd of the patients lacked knowledge to identify symptoms, carry out precautionary measures for COVID and were not worried about COVID 19 infection. People with poor education, economic poverty, and poor social support had less knowledge about COVID19. Individuals with serious mental illness …
Okonkwo, N.E.; Aguwa, U.T.; Jang, M.; Barré, I.A.; Page, K.R.; Sullivan, P.S.; Beyrer, C.; Baral, S., 2020	COVID-19 and the US response: accelerating health inequities	Narrative Review	No geographical focus	In a recent study by the Centers for Disease Control and Prevention, developmental disability, independent of underlying chronic conditions such as lung disease, cardiovascular disease and diabetes, emerged as a notable risk factor for COVID-19 infection. A larger study in New York offered similar findings, revealing that residents in institutional facilities or group homes for people with disabi…	As of late April, of New York’s 140 000 monitored people with disabilities, over 2012 have tested positive for COVID-19 and 300 have died. This translates to a death rate approximately 2.5 times higher than that characterising the state as a whole, with 214 deaths per 100 000 people with disabilities compared with 86 deaths per 100 000 New Yorkers in general. Notably, instead of implementing meas…	This article explains inequities in health in the US during the COVID 19 pandemic especially for the vulnerable such as disabled, homeless, Prisoners, asylum seekers. The authors recommend the government to take the inequities and combat it with the same intensity that it uses to combat the pandemic. The authors discuss that individuals with developmental disabilities are at a higher risk of cont…
Olulana, O.; Abedi, V.; Avula, V.; Chaudhary, D.; Khan, A.; Shahjouei, S.; Li, J.; Zand, R., 2020	Regional Association of Disability and SARS-CoV-2 Infection in 369 Counties of the United States	Framework / Expert Recommendations	No geographical focus	People living in nursing homes or long-term care facilities are more prone to the infection. Also, the regression analysis indicates that counties with higher White disabled population (est: - 0.22, 95% CI: -0.43-(-0.02); p-value: 3.3E-02), higher population with hearing disability (est: -0.26, 95% CI: -0.42- (-0.11); p-value:1.2E-03), and higher population with disability in the 18-34 years age …	These results are plausible with the knowledge that the disabled population has a higher rate of obesity, lack of physical activity, diabetes, higher rates of cardiovascular diseases that limits their body’s ability to fight the SARS-CoV-2 infection, which can ultimately lead to a poor outcome. Another reason for the high mortality rates could be due to the independent living difficulty that may …	The article is a secondary data analysis of association between SAR-CoV-2 mortality among those non-institutionalised disabled people in the counties of USA. Results indicated that while counties with a higher percentage of non-institutionalized disabled population, especially White disabled population, show a lower infection rate, they have a higher rate of SARS-CoV-2 related mortality. The auth…
Palipana, D., 2020	COVID-19 and spinal cord injuries: The viewpoint from an emergency department resident with quadriplegia	Framework / Expert Recommendations	United Kingdom (UK)	Because of their disrupted physiology, features such as fever, cough and chest pain may be absent. Therefore, the risk of missing a COVID-19 diagnosis in a person with a SCI may be elevated.	SCI patients are more vulnerable than their uninjured counterparts to complications from many conditions. Responses like a fever and cough typically expected from infectious stimuli can be impaired in a SCI. Normal physiological function such as respiration and immunity may also be affected. Sensorimotor disruption may mean that symptoms arising from an illness are not experienced the same way. T…	The article explains the challenges that SCI patients may experience in the pandemic situation especially when they access ED dept in Australia. The author suggests careful planning for prevention and management at ED with an understanding of their social situations. The author discusses that individuals with SCI are uniquely vulnerable in this pandemic. They might experience less severe symptoms…
Parsons, J.A.; Johal, H.K., 2020	Best interests versus resource allocation: could COVID-19 cloud decision-making for the cognitively impaired?	Framework / Expert Recommendations	No geographical focus	X	The pandemic is prompting doctors to think more about rationing, which may result in the devaluing of the lives of patients who lack decision-making capacity and decisions not being made in their best interests. Not providing care on a utilitarian basis, factoring in the patient’s cognitive impairment, is against the principles of the MCA 2005. Indeed, it begins to erode the rights of these patie…	The authors discuss how COVID-19 has resulted in increased pressure on healthcare providers to make decisions for individuals especially those with cognitive impairment. They discuss that this is against the rights of the individuals and often result in additional vulnerabilities. This article very clearly describes the approach taken by NHS and care providers in terms of upholding the pandemic s…
Pineda, V.S.; Corburn, J., 2020	Disability, Urban Health Equity, and the Coronavirus Pandemic: Promoting Cities for All	Editorial or Letter to the editor	No geographical focus	COVID-19 can place PWDs at a higher risk of infection since some may already have compromised immune and respiratory systems, and policy responses, such as social distancing, can lead to life-threatening disruptions in care for those that rely on home health or personal assistants.	During the COVID-19 pandemic, as well as other recent emergencies brought on by climate change and other disasters, persons with disabilities (PWDs) living in cities may be four times more likely to be injured or die than non-disabled persons, not because of their “vulnerable” position but because urban health policy, planning, and practice have not considered their needs. In China, there was a c…	This Article place Urban planning and policy in the spot light for looking through an inclusive lens and promoting the lives of PWDs during the pandemic. The authors make strong recommendation in terms of access to information, continued care / support, Non-discrimination, economic support and inclusive decision making. COVID-19 places individuals with disabilities at risk of infection and also a…
Sabatello, M.; Burke, T.B.; McDonald, K.E.; Appelbaum, P.S., 2020	Disability, Ethics, and Health Care in the COVID-19 Pandemic	Editorial or Letter to the editor	No geographical focus	Many people with disabilities—a large and diverse group encompassing individuals with a range of functional impairments, from mobility limitations to blindness or low vision and intellectual disability—are not necessarily at higher risk for contracting COVID-19. However, some subgroups are, ... For example, newly constructed alternative care settings may be impossible for blind and low vision ind…	It is unethical to use stereotypes about an individual's disability to ration care, like weighing a patient's “worth” based on the presence or absence of disabilities. Many HCPs fundamentally underestimate the value of existence with a disability. They regularly imagine individuals with disabilities to have low QALYs when most report a high caliber of life and level of joy, particularly when they…	The article describes the impact of the pandemic on access to health care among PWDs including HCP with disability in a low resource setting – India. It stresses the importance of HCPs ensuring that they maintain disability ethics and do not discriminate especially for triage services based on disability. The authors discuss that PwDs are in a vulnerable position due to unethical decisions being …
Sabatello, M.; Landes, S.D.; McDonald, K.E., 2020	People With Disabilities in COVID-19: Fixing Our Priorities	Editorial or Letter to the editor	Latin America	The COVID-19 pandemic has highlighted another systemic vulnerability for people with disabilities: inaccessible health information. Contrary to best practices that require the provision of reliable preventative and treatment advice, accessible information about COVID-19 (e.g., Braille, plain language, American Sign Language) has been neither immediately nor consistently available.	With people with disabilities entering the COVID19 pandemic worse off than their non-disabled peers in terms of risk factors for more severe outcomes, a broken health care system with a history of medical biases against people with disabilities, and an absence of consolidated disability-friendly guidelines for emergency preparedness, it is likely that people with disabilities are discounted and, …	In this article, the authors describe the most relevant and unique disadvantages that people with disabilities experience in health care and community living that place them at greater risk for disparate COVID-19 outcomes. They also recommend certain action that can help the current situation as a priority as well as future. They suggest the priority must be collection of data on the impact of co…
Safta-Zecheria, L., 2020	Challenges posed by COVID-19 to the health of people with disabilities living in residential care facilities in Romania	Cross-sectional surveys	Italy	The people going into self-isolation at home are very likely to be returning to the same communities where present employees of residential care institutions for people with disabilities live. They are also likely to be members of the same family and maybe even share a home. Once in the same space or community, the risk for contracting the virus and spreading it in the residential care institutio…	Moreover, due to the generally poor health condition of people with disabilities living in residential institutions, it is quite clear that this leaves many people exposed to having an unfortunate evolution of the COVID-19 disease once contracted.	The author explains the overwhelming proportion of people with disabilities living in residential homes which are located in a remote place that exposes them to risk of infection from trans migrant population and the care provider from their families as well as the limited economic opportunities during this pandemic. The author also recommends to ensure protection to people with disabilities livi…
Sakellariou, D.; Malfitano, A.P.S.; Rotarou, E.S., 2020	Disability inclusiveness of government responses to COVID-19 in South America: a framework analysis study	Cross-sectional surveys	India	Disabled people may be exposed to an increased risk of contracting the virus because they cannot always maintain the physical distancing measures, especially if they require personal assistance. They are at particular risk from responses to COVID-19, due to interrupted social support and lack of accessible communication, among other factors.	They are at particular risk from responses to COVID-19, due to interrupted social support and lack of accessible communication, among other factors. They are also more likely to become severely ill due to COVID-19, since many disabled people live with other underlying conditions, such as heart problems, diabetes, and respiratory illness. Nevertheless, there are widespread concerns that disabled p…	This paper summarizes the various govt responses in relation to PwDs and pandemic from several countries in South America. Some of these recommendations have been presented in the form of "action taken". However, the authors discuss that despite the govt response and adopting these actions - several have remained as recommendations and have not been adopted yet. This article describes the disabil…
Scully, J.L., 2020	Disability, Disablism, and COVID-19 Pandemic Triage	Cross-sectional surveys	United States of America (USA)	X	Both types [Govt. responses] prompted concerned responses from representatives of people with disabilities and older people, as well as ethicists and practitioners, to the suggested criteria for excluding certain people from various stages of care. At worst, it was argued, these criteria discriminate unjustly against a broad class of people with disability or people over what was felt to be an ar…	This paper examines the impact of disablism on pandemic triage guidance for allocation of critical care. It identifies three underlying disablist assumptions about disability and health status, quality of life, and social utility, that unjustly and potentially catastrophically disadvantage people with disability in COVID-19 and other global health emergencies. The authors suggest revisiting the w…
Senjam, S.S., 2020	Impact of COVID-19 pandemic on people living with visual disability	Cross-sectional surveys	No geographical focus	People living with visual disabilities (low vision and blindness) are more likely susceptible to get infected by the SARS‑CoV 2 than people without visual disabilities. This means that around 253 million people in the world, of which more than two‑third from low‑middle income countries, will be at higher risk of getting the infection from the SARS‑CoV‑2. The higher possibility in terms of contrac…	The morbidity and mortality is likely to be higher if these groups of individuals are affected by the COVID‑19 disease in India, though the risk of level varies by the degree of visual disabilities.	The article speaks about the risks and issues that PxVD experiences during the pandemic and how it could make them more vulnerable to the pandemic situation. The authors target three key areas for action 1. Environmental factors, 2. Personal Factors and 3. Covid restrictions. They also make recommendations for the same. The authors discuss that individuals with visual disabilities are more likely…
Sholas, M.G., 2020	The actual and potential impact of the novel 2019 coronavirus on pediatric rehabilitation: A commentary and review of its effects and potential disparate influence on Black, Latinx and Native American marginalized populations in the United States	Systematic analysis of electronic medical/ administrative records	No geographical focus	Although children with physical disabilities have a broader treatment team than typically developing children, they are not exempt from larger demonstrated issues of access to a medical home. In addition, children from communities of lower socioeconomic status use public transportation and those with disabilities rely heavily on ride-sharing programs. These modes of transport compel more exposure…	The possibility that there could be a differential effect on rehabilitation services relates to: the risk of familial/parental exposure leading to secondary infection, the negative economic impact of public health measures required to control disease spread, and the pre-existing social factors that impact access to healthcare. Insurance-based disparities cause children to be less likely to find a…	This article describes the impact of COVID19 on children with disabilities who are additionally vulnerable because of their socio-economic, ethic and financial status in the society. The authors provide recommendations to ensure that marginalized communities, like Black, Latinx, and Native American children, do not continue to be disproportionately impacted in a negative way by this Pandemic. Chi…
Singh, S., 2020	Disability ethics in the coronavirus crisis	Systematic analysis of electronic medical/ administrative records	United States of America (USA)	People with some disabilities have been under informed about COVID-19 and its ramiﬁcations. Consider the following: information conveyed via charts and graphs is inaccessible for blind and low-vision individuals and incomprehensible for people with intellectual disability (and others) if not provided in plain language. Similarly, news brieﬁngs conducted without captioning or qualiﬁed American Sig…	Inconsistent application and interpretation of existing standards may similarly result in Discriminatory outcomes for people with disabilities. For example, New York State’s2015 Ventilator Allocation Guidelines (currently under review by the OCR) could be interpreted to allow the removal and reallocation of personal ventilators of people using them regularly if they arrive at a hospital from chro…	This article considers key ethical, legal, and medical dilemmas arising for people with disabilities in the COVID-19 pandemic. The authors have describes the issues and concerns faced by PWDs Especially in access to information and clinician–patient communication, non-discrimination and reasonable accommodations, and rationing of medical goods), and indicate possible solutions. The author discuss…
Solomon, M.Z.; Wynia, M.K.; Gostin, L.O., 2020	Covid-19 Crisis Triage — Optimizing Health Outcomes and Disability Rights	Ecological study	No geographical focus	X	The Americans with Disabilities Act (ADA) proscribes adverse treatment of persons with disabilities, but discrimination is common, including in the health system. (…)a first-come, first-served process.5 But that approach would leave many people with disabilities worse off; in particular, people facing transportation, communication, and other barriers to access could be systematically disadvantage…	This perspective paper recommends the collaboration of disability rights advocates and health care leaders to strengthen the health systems and make it disability inclusive especially during this COVID-19 pandemic. To ensure the trustworthiness of the health system, disability rights advocates and health care leaders should work together to finalize crisis triage plans that save the most lives, p…
Stillman, M.D.; Capron, M.; Alexander, M.; Di Giusto, M.L.; Scivoletto, G., 2020	COVID-19 and spinal cord injury and disease: results of an international survey	Ecological study	United States of America (USA)	X	In an international survey of health care professionals who care for spinal cord individuals (n= 783), 10.3% reported their patients with COVID-19 had increased spasticity and that 6.9% reported that their patients had rigors.	This article describes an online survey to assess the COVID-19-related practices and adaptations among health care professionals working with individuals with SCI/D. The concerns of the SCI patients were gathered from the care teams. The concerns included disruption in outpatient services, reduced treatment hours and transformation of services to tele-medicine. ‘ There is a need to develop guidel…
Tohidast, S.A.; Mansuri, B.; Bagheri, R.; Azimi, H., 2020	Provision of speech-language pathology services for the treatment of speech and language disorders in children during the COVID-19 pandemic: Problems, concerns, and solutions	Systematic review	United States of America (USA)	X	X	The article explains the difficulties and need for considering continuum of SLP services amidst COVID19. The authors recommend building capacity, and the use of organizational influence to build capacity as well as the use of AAC not just for those with SLP disabilities but also those who went through tracheostomy and ventilator procedures following COVID and their communication problems too. The…
Turk, M.A.; Landes, S.D.; Formica, M.K.; Goss, K.D., 2020	Intellectual and developmental disability and covid-19 case-fatality trends: Trinetx analysis	Analysis of COVID-19 press conferences	Low- and Middle-Income countries (LMICs)	X	An article in the New York Times9 details that as of April 6, 2020, the COVID-19 death rate among adults with IDD receiving residential services in the state of New York was 9.5%,9 compared to a substantially lower overall death rate from COVID-19 in New York State at 4.0%.10 Two reports from European countries indicate similar to lower death rates among people with IDD. Utilizing an online datab…	This article looks at the relationship of covid 19 rates and mortality in people with ID and non-ID. The Results showed that people with IDD have higher prevalence of comorbid risk factors often associated with poor COVID 19 outcomes. In terms of the ages , the cases were in peak from age group 18-74 , it was very high for 0-17 and a bit low for age group >75. The authors discuss that individuals…
Turk, M.A.; McDermott, S., 2020	The COVID-19 pandemic and people with disability	Analysis of webpages on accessibility compliance	No geographical focus	X	And for those with new-onset disability or those engaging in outpatient or community-based rehabilitation, there are interruptions in services with possible increase in recovery time or preventable loss of function. People with disability are looking for information related to their likely increased risk for significant COVID-19 morbidity and mortality. Researchers and clinicians have highlighted…	The commentary briefly highlights the challenges faced by PWDs in COVID. They recommend disaggregated data and research for informing COVID related practice and to remove barriers to provide access to services for PWDs. The authors discuss that vulnerabilities experienced by PwDs need to be discussed. PwDs have experienced several vulnerabilities in relation to screening and triage decisions, dis…
Umucu, E.; Lee, B., 2020	Examining the impact of COVID-19 on stress and coping strategies in individuals with disabilities and chronic conditions	Documentary research and framework analysis	Latin America	X	In a global health pandemic situation, it is especially important to provide adequate care and resources to people with chronic conditions and disabilities as the risks of COVID-19 can affect them disproportionately… Their existing chronic conditions and disabilities may place them at a greater risk for developing more severe complications from COVID-19, which can increase perceived stress, and u…	This article, a cross-sectional survey of 269 individuals with self-reported disabilities and chronic conditions, addresses how COVID 19 affects PWD especially their stress coping and wellbeing. It is very clear from the results that PWD exhibit both adaptive and maladaptive coping strategies for their stressors and it is very important any care provider to be aware of these coping mechanisms and…
Waldman, H.B.; Rader, R.; Keller, S.M.; Perlman, S.P., 2020	Who's Next?	Case report (4 patients)	No geographical focus	X	Advocates in Washington State fear that people who are disabled could be at higher risk of death when doctors and hospitals make end-of-life triage decisions. Then there are individuals with Down syndrome who are already more susceptible to respiratory diseases due to smaller air passages and being more immuno-compromised. Added to that, is the higher rate of cardiovascular pre-existing condition…	This article explains the ethical issues, fairness and clinical judgement related to providing equal access to ventilators and shared decision making. The authors highlight the balance that clinicians and policy makers must have when it comes to prioritizing decisions that do not discriminate PWDs. This is a report by the American Academy of Developmental Medicine and Dentistry. They discuss that…
Waldman, H.B.; Rader, R.; Perlman, S.P., 2020	What Are We Learning?	Ecological study	United States of America (USA)	While children overall seem to be less likely to show symptoms of COVID-19, those with disabilities may fall into the category of ‘high risk’ due to secondary health conditions; further adding to caregiver stress related to fears of infection and contagion.	People with Down syndrome who have certain underlying conditions may be at risk for a more serious course of COVID-19, which can cause symptoms such as: loss of taste and smell, shortness of breath, fever, cough and digestive issues. While children overall seem to be less likely to show symptoms of COVID-19, those with disabilities may fall into the category of ‘high risk’ due to secondary health…	This article highlights the approaches used towards supporting PWDs especially children during the pandemic. It highlights the need for including PWDs in any planning for COVID 19 at all levels and recommends to implement these plans at all levels to prevent the risks and promote continuum of care for PWDs during the COVID-19 situation. The authors point out that the following groups of individua…
Yap, J.; Chaudhry, V.; Jha, C.K.; Mani, S.; Mitra, S., 2020	Are responses to the pandemic inclusive? A rapid virtual audit of COVID-19 press briefings in LMICs	Observational multicenter study	United Kingdom (UK)	Our virtual audit shows that only 65% of countries have a sign language interpreter (SLI) present in COVID-19 press brieﬁngs and conferences. This number is smaller in low-income countries (41%) and Sub Saharan. African countries (54%). Surprisingly, none of the international organizations including the WHO has a SLI present during COVID-19 press brieﬁngs….. A majority of countries in Latin Ameri…	X	The article describes the results of the virtual analysis of informational access for people with hearing impairment during the pandemic and use of SLI during press briefings and media releases. 65% of the countries had SLI with SSA – 54%, SA 50% and middle-east 33% . In this article, the authors discuss the need for having a sign-language interpreter for all emergency press briefings and confere…
